# Supplementary material for: Male Remating Success and the Frequency of Copulatory Plugs in the Green Lynx SpiderPeucetia viridans(Araneae, Oxyopidae)
Source: Hindawi journal article supplement (doi:10.1155/2010/602897), 2010-01-01
Supplement: f1 [file 602897.f1.pdf]

Supplementary Table 1. Epigynal condition of mated *Peucea viridans* females collected from sites in Los Angeles and San Diego Counties, California, in October-November 2004. For each female, the presence of a male paracymbial process and/or an epigynal plug were noted for each of her epigynal orifices; following Table 1, plugs were scored as complete or partial if present. Since each female has paired orifices, "two" in the tables below denotes presence in both left and right orifices, while "one" denotes presence in the left or right orifice only. For each combination of paracymbial process and plug condition, the number of females with that configuration is indicated. Row and column totals ( $n$ ) are also provided.

A. All samples ( $n = 54$ )

| Paracymbial Processes | Epigynal Plugs |              |             |             |             | $n =$ |
|-----------------------|----------------|--------------|-------------|-------------|-------------|-------|
|                       | Two Complete   | One Complete | Two Partial | One Partial | Both Absent |       |
| Two Present           | 7              | 0            | 0           | 0           | 0           | 7     |
| One Present           | 2              | 5            | 0           | 0           | 1           | 8     |
| Both Absent           | 2              | 9            | 1           | 1           | 26          | 39    |
| $n =$                 | 11             | 14           | 1           | 1           | 27          | 54    |

B. Kenneth Hahn State Recreation Area, Los Angeles Co. ( $n = 34$ )

| Paracymbial Processes | Epigynal Plugs |              |             |             |             | $n =$ |
|-----------------------|----------------|--------------|-------------|-------------|-------------|-------|
|                       | Two Complete   | One Complete | Two Partial | One Partial | Both Absent |       |
| Two Present           | 4              | 0            | 0           | 0           | 0           | 4     |
| One Present           | 2              | 4            | 0           | 0           | 1           | 7     |
| Both Absent           | 2              | 8            | 1           | 1           | 11          | 23    |
| $n =$                 | 8              | 12           | 1           | 1           | 12          | 34    |

Supplementary Table 1. Continued.

C. Ernest Debs Regional Park, Los Angeles Co. ( $n = 7$ )

| Paracymbial Processes | Epigynal Plugs |              |             |             |             | $n =$ |
|-----------------------|----------------|--------------|-------------|-------------|-------------|-------|
|                       | Two Complete   | One Complete | Two Partial | One Partial | Both Absent |       |
| Two Present           | 3              | 0            | 0           | 0           | 0           | 3     |
| One Present           | 0              | 1            | 0           | 0           | 0           | 1     |
| Both Absent           | 0              | 0            | 0           | 0           | 3           | 3     |
| $n =$                 | 3              | 1            | 0           | 0           | 3           | 7     |

D. Loyola Marymount University, Los Angeles Co. ( $n = 9$ )

| Paracymbial Processes | Epigynal Plugs |              |             |             |             | $n =$ |
|-----------------------|----------------|--------------|-------------|-------------|-------------|-------|
|                       | Two Complete   | One Complete | Two Partial | One Partial | Both Absent |       |
| Two Present           | 0              | 0            | 0           | 0           | 0           | 0     |
| One Present           | 0              | 0            | 0           | 0           | 0           | 0     |
| Both Absent           | 0              | 0            | 0           | 0           | 9           | 9     |
| $n =$                 | 0              | 0            | 0           | 0           | 9           | 9     |

E. Crest Canyon Preserve, Del Mar, San Diego Co. ( $n = 2$ )

| Paracymbial Processes | Epigynal Plugs |              |             |             |             | $n =$ |
|-----------------------|----------------|--------------|-------------|-------------|-------------|-------|
|                       | Two Complete   | One Complete | Two Partial | One Partial | Both Absent |       |
| Two Present           | 0              | 0            | 0           | 0           | 0           | 0     |
| One Present           | 0              | 0            | 0           | 0           | 0           | 0     |
| Both Absent           | 0              | 1            | 0           | 0           | 1           | 2     |
| $n =$                 | 0              | 1            | 0           | 0           | 1           | 2     |

Supplementary Table 1. Continued.

F. Carmel Valley Road, Del Mar, San Diego Co. ( $n = 2$ )

| Paracymbial Processes | Epigynal Plugs |              |             |             |             | $n =$ |
|-----------------------|----------------|--------------|-------------|-------------|-------------|-------|
|                       | Two Complete   | One Complete | Two Partial | One Partial | Both Absent |       |
| Two Present           | 0              | 0            | 0           | 0           | 0           | 0     |
| One Present           | 0              | 0            | 0           | 0           | 0           | 0     |
| Both Absent           | 0              | 0            | 0           | 0           | 2           | 2     |
| $n =$                 | 0              | 0            | 0           | 0           | 2           | 2     |

Supplementary Table 2. Means ( $\pm$  SE) of the residual index for field-collected *Peuceitia viridans* females grouped by combinations of copulatory plugs and paracymbial processes in their epigyna. As noted in the text, two females with one and two partial plugs, respectively, are not included here, hence the sample size difference between Table 4 ( $n = 54$ ) and this table ( $n = 52$ ). The results of one-way analysis of variance (ANOVA) for differences among groups are also shown, as are the results of post-hoc comparisons using Fisher's PLSD test when there was a significant  $F$  for ANOVA.

| Epigynal Object  |                       | Combination |        |             | ANOVA    |                    |
|------------------|-----------------------|-------------|--------|-------------|----------|--------------------|
|                  |                       | Two         | One    | None        | <i>F</i> | <i>P</i>           |
| Copulatory plugs | <i>n</i> =            | 11          | 14     | 27          | 3.278    | 0.046 <sup>*</sup> |
|                  | $\overline{X}$ =      | -0.069      | -0.041 | 0.050       |          |                    |
|                  | SE =                  | 0.045       | 0.041  | 0.028       |          |                    |
|                  | Post-hoc comparisons: |             |        | Two vs One  |          | 0.643              |
|                  |                       |             |        | Two vs None |          | 0.029 <sup>*</sup> |
|                  |                       |             |        | One vs None |          | 0.067              |
|                  | Paracymbia            | <i>n</i> =  | 7      | 8           | 37       | 2.961              |
| $\overline{X}$ = |                       | -0.127      | 0.026  | 0.019       |          |                    |
| SE =             |                       | 0.056       | 0.063  | 0.023       |          |                    |

<sup>\*</sup>  $p < 0.05$ .

Supplementary Table 3. Means ( $\pm$  SE) of the residual index for field-collected *Peucetia viridans* females by sample site. This table includes the sample set of females ( $n = 52$ ) as Supplementary Table 2. The results of one-way analysis of variance (ANOVA) for differences among sites and the results of post-hoc comparisons using Fisher's PLSD test are also shown. Site abbreviations are defined in the text.

| Site                  | Residual Index |                |            | ANOVA |                     |
|-----------------------|----------------|----------------|------------|-------|---------------------|
|                       | $n$            | $\overline{X}$ | SE         | $F$   | $P$                 |
| HSR                   | 32             | -0.013         | 0.025      | 3.456 | 0.015 <sup>*</sup>  |
| DEB                   | 7              | -0.054         | 0.057      |       |                     |
| LMU                   | 9              | 0.128          | 0.047      |       |                     |
| CCN                   | 2              | -0.224         | 0.038      |       |                     |
| CVR                   | 2              | 0.040          | 0.046      |       |                     |
| Post-hoc comparisons: |                |                | HSR vs DEB |       | 0.484               |
|                       |                |                | HSR vs LMU |       | 0.012 <sup>*</sup>  |
|                       |                |                | HSR vs CCN |       | 0.046 <sup>*</sup>  |
|                       |                |                | HSR vs CVR |       | 0.614               |
|                       |                |                | DEB vs LMU |       | 0.014 <sup>*</sup>  |
|                       |                |                | DEB vs CCN |       | 0.140               |
|                       |                |                | DEB vs CVR |       | 0.411               |
|                       |                |                | LMU vs CCN |       | 0.003 <sup>**</sup> |
|                       |                |                | LMU vs CVR |       | 0.430               |
|                       |                |                | CCN vs CVR |       | 0.068               |

<sup>\*</sup>  $p < 0.05$ , <sup>\*\*</sup>  $p < 0.01$ .
